# Supplementary material for: Detection and elimination of a novel non-toxigenic Clostridioides difficile strain from the microbiota of a mouse colony
Source: PubMed Central journal article supplement — Gut Microbes. 2020 Dec 11;12(1):1851999. doi: 10.1080/19490976.2020.1851999 (PMC7734020; doi:10.1080/19490976.2020.1851999), 2020-12-11
Supplement: KGMI_A_1851999_SM8504.pdf [file KGMI_A_1851999_SM8504.pdf]

| Description                            | Query Cover | E value | Percent Identified | Accession  |
|----------------------------------------|-------------|---------|--------------------|------------|
| Clostridioides difficile strain FC6877 | 100%        | 0.0     | 100.00%            | MN060981.1 |
| Clostridioides difficile MRN121781     | 100%        | 0.0     | 100.00%            | MN049824.1 |
| Clostridioides difficile CDT25         | 100%        | 0.0     | 100.00%            | MN049583.1 |

Supplemental table 1. Bacterial CFU from ABX-treated, uninfected mice is confirmed to be *C. difficile* by Sanger sequencing. Sanger sequencing was performed on PCR amplified 16s rDNA gene segments of bacteria isolated from PBS mock infected mice that were culture positive for *C. difficile*. Table shows results of trimmed sequences queried to NCBI BLAST database.

| Method                    | Description              | Sequence                      |
|---------------------------|--------------------------|-------------------------------|
| Sanger Sequencing         | Forward 16s 8F primer    | AGAGTTTGATCCTGGCTCAG          |
|                           | Reverse 16s 1492R primer | GGTTACCTTGTTACGACTT           |
| PCR Ribotyping            | 16S_Cdiff_Ribo - FWD     | GCTGGATCACCTCCTTTCTAAG        |
|                           | 23S_Cdiff_Ribo - REV     | TGACCAGTTAAAAAGTTTGATAGATT    |
| Florescent PCR Ribotyping | 16S_Cdiff_Ribo - FWD     | GTGCG GCTGGATC ACCTC CT       |
|                           | 23S_Cdiff_Ribo - REV     | FAM/CCCTGCACCCTTAATAACTT GACC |

Supplemental table 2. Primers used in this study. Sanger sequencing PCR primers, PCR ribotyping primers, and fluorescent PCR ribotyping.
